# Supplementary material for: Bioactive Compounds in Sarcocornia and Arthrocnemum, Two Wild Halophilic Genera from the Iberian Peninsula
Source: MDPI journal article supplement (doi:10.3390/plants10102218), 2021-10-19
Supplement: s1 [file s1]

**Table S1.** Relative content of the phenolic compounds (%) in *Sarcocornia* and *Arthrocnemum* samples by GC-MS. Legend: nd: not detected. Numbers 1–20 refer to the materials shown in Table 3.

| ID | Coumaric Acid | Salicylic Acid | Veratric Acid | Caffeic Acid | Trans-cinnamic Acid | Ferulic Acid |
|----|---------------|----------------|---------------|--------------|---------------------|--------------|
| 1  | 10.05 (0.01)  | nd             | 39.11 (0.02)  | 10.22 (0.01) | 38.90 (0.03)        | nd           |
| 2  | nd            | nd             | nd            | nd           | 98.65 (0.02)        | nd           |
| 3  | nd            | nd             | nd            | nd           | 97.24 (0.04)        | nd           |
| 4  | nd            | nd             | nd            | nd           | 96.17 (0.02)        | nd           |
| 5  | 9.88 (0.19)   | nd             | 38.17 (0.07)  | 11.78 (0.02) | 41.65 (0.03)        | nd           |
| 6  | nd            | nd             | 39.65 (0.01)  | nd           | 61.12 (0.01)        | nd           |
| 7  | 4.81 (0.01)   | 57.22 (0.05)   | nd            | nd           | 31.66 (0.07)        | nd           |
| 8  | nd            | nd             | 31.23 (0.03)  | 16.34 (0.02) | 44.68 (0.01)        | nd           |
| 9  | 4.92 (0.03)   | 58.77 (0.05)   | nd            | nd           | 29.21 (0.02)        | nd           |
| 10 | 4.87 (0.08)   | 56.04 (0.05)   | nd            | nd           | 30.17 (0.02)        | nd           |
| 11 | nd            | nd             | 30.06 (0.02)  | nd           | 62.71 (0.04)        | nd           |
| 12 | nd            | 31.09 (0.05)   | nd            | nd           | 67.12 (0.01)        | nd           |
| 13 | nd            | 30.77 (0.01)   | nd            | nd           | 64.19 (0.03)        | nd           |
| 14 | nd            | 32.05 (0.02)   | nd            | nd           | 65.35 (0.03)        | nd           |
| 15 | 20.60 (0.03)  | nd             | 13.47 (0.01)  | 6.58 (0.01)  | nd                  | 59.89 (0.07) |
| 16 | 11.07 (0.03)  | 30.85 (0.01)   | 30.75 (0.04)  | 12.02 (0.01) | 10.09 (0.02)        | nd           |
| 17 | 19.80 (0.03)  | nd             | 15.67 (0.01)  | 5.44 (0.01)  | nd                  | 56.40 (0.04) |
| 18 | 11.63 (0.03)  | 29.88 (0.07)   | 32.81(0.04)   | 10.34 (0.01) | 10.12 (0.03)        | nd           |
| 19 | 10.34 (0.03)  | 28.19 (0.04)   | 31.64 (0.04)  | 11.10 (0.01) | 10.87 (0.05)        | nd           |
| 20 | 10.81 (0.03)  | 27.66 (0.01)   | 31.08 (0.04)  | 11.90 (0.01) | 11.77(0.03)         | nd           |

**Table S2.** Relative content of the fatty acids (%) in *Sarcocornia* and *Arthrocnemum* by GC-MS. Legend: lauric acid (C12:0); myristic acid (C14:0); palmitic acid (C16:0); stearic acid (C18:0); oleic acid (C18:1); linoleic acid (C18:2); linolenic acid (C18:3); arachidonic acid (C20:0); behenic acid (C22:0); lignoceric acid (C24:0); SFAs (saturated fatty acids); MUFAs (monounsaturated fatty acids); and PUFAs (polyunsaturated fatty acids). nd: not detected. Numbers 1–20 refer to the materials shown in Table 3.

| I<br>D | C12:<br>0 | C14:<br>0 | C16:<br>0 | C18:<br>0 | C18:<br>1 | C18:<br>2 | C18:<br>3 | C20:<br>0 | C22:<br>0 | C24:<br>0 | Total<br>SFA<br>s | Total<br>MUFA<br>s | Total<br>PUFA<br>s |
|--------|-----------|-----------|-----------|-----------|-----------|-----------|-----------|-----------|-----------|-----------|-------------------|--------------------|--------------------|
| 1      | nd        | nd        | 35.90     | 5.11      | 11.83     | 24.88     | nd        | 3.15      | 5.09      | nd        | 49.25             | 11.83              | 24.88              |
| 2      | 9.45      | nd        | 32.29     | 9.28      | 14.39     | 19.75     | nd        | 5.10      | 4.44      | nd        | 60.56             | 14.39              | 19.75              |
| 3      | 8.69      | nd        | 33.24     | 10.14     | 13.90     | 18.60     | nd        | 5.30      | 4.69      | nd        | 62.06             | 13.90              | 18.60              |
| 4      | 9.33      | nd        | 35.01     | 10.43     | 12.55     | 20.33     | nd        | 4.90      | 4.28      | nd        | 63.95             | 12.55              | 20.33              |
| 5      | nd        | nd        | 37.85     | 5.08      | 10.28     | 23.12     | nd        | 4.32      | 4.11      | nd        | 51.36             | 10.28              | 23.12              |
| 6      | nd        | nd        | 28.77     | 5.44      | 10.67     | nd        | nd        | 15.55     | 16.72     | 17.24     | 83.72             | 10.67              | nd                 |
| 7      | 8.73      | 12.09     | 28.64     | 18        | 16.21     | 16.18     | nd        | nd        | nd        | nd        | 67.48             | 16.21              | 16.18              |
| 8      | nd        | nd        | 27.33     | 9.29      | 9.43      | nd        | nd        | 14.12     | 17.63     | 14.11     | 82.55             | 9.43               | nd                 |
| 9      | 9.39      | 11.29     | 20.11     | 5.81      | 18.19     | 16.94     | nd        | nd        | nd        | nd        | 66.03             | 18.19              | nd                 |
| 10     | 9.82      | 11.44     | 20.71     | 17.76     | 20.96     | 17.33     | nd        | nd        | nd        | nd        | 59.73             | 20.96              | 17.33              |
| 11     | nd        | nd        | 29.12     | 9.16      | 9.22      | nd        | nd        | 15.44     | 17.87     | 14.62     | 82.21             | 9.22               | nd                 |
| 12     | 15.75     | 14.55     | 40.06     | 7.11      | nd        | nd        | 22.40     | nd        | nd        | nd        | 77.97             | nd                 | 22.40              |
| 13     | nd        | nd        | 38.71     | 5.91      | 14.20     | 21.02     | 13.70     | 3.09      | 2.75      | 2.59      | 53.05             | 14.20              | 34.72              |
| 14     | nd        | nd        | 39.12     | 5.04      | 15.52     | 17.80     | 14.30     | 2.14      | 2.80      | 3.1       | 52.20             | 15.52              | 32.10              |

|    |    |    |       |       |      |       |       |       |       |       |       |      |       |
|----|----|----|-------|-------|------|-------|-------|-------|-------|-------|-------|------|-------|
| 15 | nd | nd | 21.30 | 19.35 | 9.13 | 10.75 | 10.80 | 5.35  | 8.40  | 9.20  | 63.60 | 9.13 | 26.55 |
| 16 | nd | nd | 20.78 | 10.90 | 9.04 | 10.30 | 16.55 | 10.40 | 13.25 | 9.60  | 61.93 | 9.04 | 26.85 |
| 17 | nd | nd | 19.25 | 19.90 | 9.44 | 7.77  | 10.10 | 5.90  | 7.75  | 10.09 | 62.74 | 9.44 | 17.87 |
| 18 | nd | nd | 19.11 | 10.58 | 5.40 | 15.33 | 14.91 | 10.12 | 15.07 | 10.26 | 65.11 | 5.40 | 29.03 |
| 19 | nd | nd | 18.70 | 10.04 | 7.88 | 8.32  | 15.78 | 9.60  | 14.70 | 11.24 | 73.16 | 7.88 | 18.38 |
| 20 | nd | nd | 19.80 | 10.73 | 6.20 | 10.22 | 15.76 | 10.08 | 15.22 | 9.92  | 64.80 | 6.20 | 25.98 |

**Table S3.** Main tentative flavonoids and hydroxycinnamic acids in *Sarcocornia* and *Arthrocnemum* according to their retention time. Numbers 1–20 refer to the materials shown in Table 3. Legend: + = presence; in brackets, we show the retention times. . = absence.

| ID | p-coumaroyl<br>glucose | Cyanidin-<br>3-O-<br>arabinoside | Luteolin-7-O-<br>glucoside | Dihydroquercetin | p-coumaroyl<br>tyrosine | Luteolin |
|----|------------------------|----------------------------------|----------------------------|------------------|-------------------------|----------|
| 1  | .                      | +(21)                            | +(24.7)                    | .                | .                       | +(37.2)  |
| 2  | .                      | .                                | .                          | .                | .                       | +(37.2)  |
| 3  | .                      | .                                | .                          | .                | .                       | +(37.2)  |
| 4  | .                      | .                                | .                          | .                | .                       | +(37.2)  |
| 5  | .                      | +(21)                            | +(24.7)                    | .                | .                       | +(37.2)  |
| 6  | +(20.4)                | .                                | +(24.7)                    | +(30)            | +(32)                   | +(37.2)  |
| 7  | +(20.4)                | .                                | +(24.7)                    | +(30)            | +(32)                   | +(37.2)  |
| 8  | +(20.4)                | .                                | +(24.7)                    | +(30)            | +(32)                   | +(37.2)  |
| 9  | +(20.4)                | .                                | +(24.7)                    | +(30)            | +(32)                   | +(37.2)  |
| 10 | +(20.4)                | .                                | +(24.7)                    | +(30)            | +(32)                   | +(37.2)  |
| 11 | +(20.4)                | .                                | +(24.7)                    | +(30)            | +(32)                   | +(37.2)  |
| 12 | .                      | .                                | .                          | .                | .                       | +(37.2)  |
| 13 | .                      | .                                | .                          | .                | .                       | +(37.2)  |
| 14 | .                      | .                                | .                          | .                | .                       | +(37.2)  |
| 15 | .                      | .                                | .                          | +(30)            | .                       | +(37.2)  |
| 16 | .                      | .                                | .                          | +(30)            | .                       | +(37.2)  |
| 17 | .                      | .                                | .                          | +(30)            | .                       | +(37.2)  |
| 18 | .                      | .                                | .                          | +(30)            | .                       | +(37.2)  |
| 19 | .                      | .                                | .                          | +(30)            | .                       | +(37.2)  |
| 20 | .                      | .                                | .                          | +(30)            | .                       | +(37.2)  |

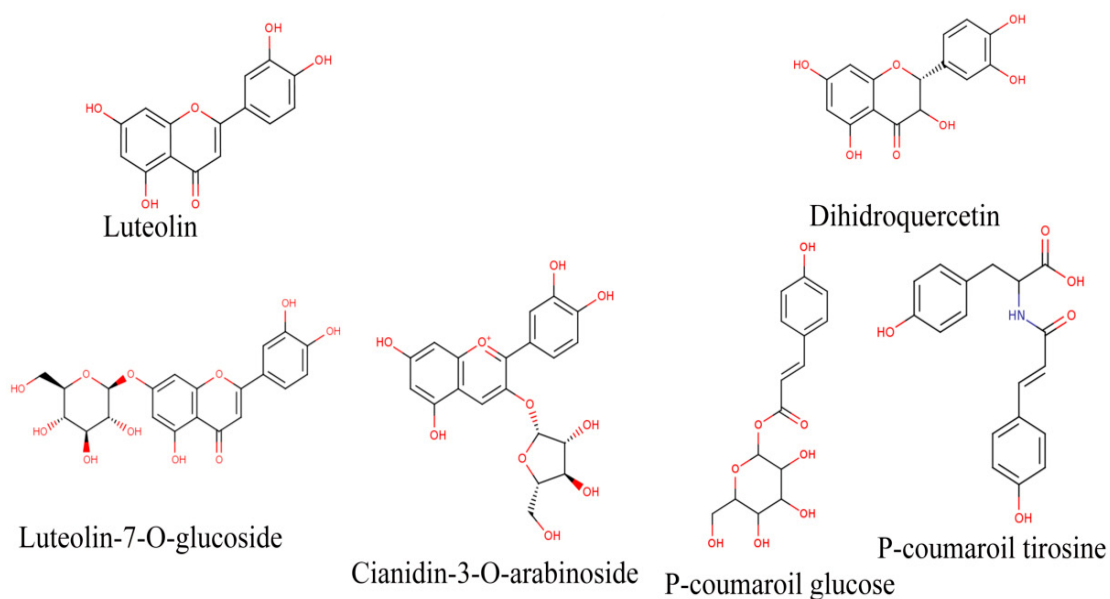

**Figure S1.** Tentative flavonoid compounds identified in *Sarcocornia* and *Arthrocnemum* extracts. All structures are based on Phenol Explorer.
